1 **The genomic basis of mood instability: identification of 46 loci in 363,705 UK Biobank participants,**  
2 **genetic correlation with psychiatric disorders, and association with gene expression and function.**

3 Joey Ward MSc<sup>1</sup>, Elizabeth M. Tunbridge DPhil<sup>2, 3</sup>, Cynthia Sandor PhD DVM<sup>4</sup>, Laura M. Lyall PhD<sup>1</sup>,  
4 Amy Ferguson BSc<sup>1</sup>, Rona J. Strawbridge PhD<sup>1, 5</sup>, Donald M. Lyall PhD<sup>1</sup>, Breda Cullen PhD<sup>1</sup>, Nicholas  
5 Graham MBChB<sup>1</sup>, Keira J.A. Johnston MSc<sup>1</sup>, Caleb Webber PhD<sup>4, 6</sup>, Valentina Escott-Price PhD<sup>7</sup>,  
6 Michael O'Donovan PhD<sup>7</sup>, Jill P. Pell<sup>1</sup> PhD, Mark E.S. Bailey PhD<sup>8</sup>, Paul J. Harrison<sup>2, 3</sup> DM (Oxon),  
7 Daniel J. Smith MD<sup>1</sup>

8 <sup>1</sup>Institute of Health and Wellbeing, University of Glasgow, Glasgow, UK, <sup>2</sup>Department of Psychiatry,  
9 University of Oxford, UK, <sup>3</sup>Oxford Health NHS Foundation Trust, <sup>4</sup>UK Dementia Research Institute,  
10 Cardiff University, Cardiff, UK, <sup>5</sup>Department of Medicine Solna, Karolinska Institute, Stockholm,  
11 Sweden, <sup>6</sup>Department of Physiology, Anatomy and Genetics, Oxford, UK, <sup>7</sup>University of Cardiff,  
12 Cardiff, UK, <sup>8</sup>School of Life Sciences, College of Medical, Veterinary and Life Sciences, University of  
13 Glasgow, Glasgow, UK.

14

15 Corresponding Author: Professor Daniel Smith

16 Address: Mental Health and Wellbeing, Gartnavel Royal Hospital, 1055 Great Western Road,  
17 Glasgow G12 0XH,

18 Telephone: 0141 211 3930

19 Email: [Daniel.Smith@glasgow.ac.uk](mailto:Daniel.Smith@glasgow.ac.uk)

20

21

22

23

24

25

26

1  
2  
3  
4  
5  
6  
7  
8  
9  
10  
11  
12  
13  
14  
15  
16  
17  
18  
19  
20

## Abstract

Genome-wide association studies (GWAS) of psychiatric phenotypes have tended to focus on categorical diagnoses, but to understand the biology of mental illness it may be more useful to study traits which cut across traditional boundaries. Here we report the results of a GWAS of mood instability as a trait in a large population cohort (UK Biobank, n = 363,705). We also assess the clinical and biological relevance of the findings, including whether genetic associations show enrichment for nervous system pathways. Forty six unique loci associated with mood instability were identified with a SNP heritability estimate of 9%. Linkage Disequilibrium Score Regression (LDSR) analyses identified genetic correlations with Major Depressive Disorder (MDD), Bipolar Disorder (BD), Schizophrenia, anxiety and Post Traumatic Stress Disorder (PTSD). Gene-level and gene set analyses identified 244 significant genes and 6 enriched gene sets. Tissue expression analysis of the SNP-level data found enrichment in multiple brain regions, and eQTL analyses highlighted an inversion on chromosome 17 plus two brain-specific eQTLs. Additionally, we used a Phenotype Linkage Network (PLN) analysis and community analysis to assess for enrichment of nervous system gene sets using mouse orthologue databases. The PLN analysis found enrichment in nervous system PLNs for a community containing serotonin and melatonin receptors. In summary, this work has identified novel loci, tissues and gene sets contributing to mood instability. These findings may be relevant for the identification of novel trans-diagnostic drug targets and could help to inform future precision medicine innovations in mental health.

1  
2  
3  
4  
5  
6  
7  
8  
9  
10  
11  
12  
13  
14  
15  
16  
17  
18  
19  
20

## Introduction

Mood instability is a subjective emotional state defined as rapid oscillations of intense affect, with difficulty regulating these oscillations and their behavioural consequences<sup>1</sup>. As a psychopathological phenotype, mood instability may be useful for psychiatric research within a Research Domain Classification (RDoC) framework<sup>2</sup> because it is a symptom that occurs in several psychiatric disorders, particularly major depressive disorder (MDD) and bipolar disorder (BD). It is also present within general population samples, and is known to be associated with a range of adverse health outcomes<sup>3</sup>.

We recently identified four loci associated with mood instability within a subsample of the UK Biobank cohort (n = 113,968) and found genetic correlation with both MDD and schizophrenia<sup>4</sup>. Here, we report a significantly larger genome-wide association study (GWAS) of mood instability in the European ancestry subset of UK Biobank dataset (n = 363,705), using a BOLT-LMM approach to maximize statistical power. We also revisit the assessment of genetic correlations with psychiatric disorders, including the use of more recent GWAS outputs for MDD, schizophrenia and BD. Furthermore, we contextualize our findings in terms of affected tissues, eQTL analysis and Phenotype Linkage Network (PLN) analysis. PLN is a new methodology that harnesses the fact that variation in many complex traits results from perturbations of multiple molecular components within a smaller number of cellular pathways. These pathways can then be identified using gene network approaches.

## 1 **Methods**

### 2 **UK Biobank sample**

3 UK Biobank is a large cohort of over 500,000 United Kingdom residents, aged between 39 and 69  
4 years<sup>5</sup>. UK Biobank was created to study the genetic, environmental and lifestyle factors that  
5 cause or prevent a range of morbidities in middle and older age. Baseline assessments occurred  
6 over a 4-year period, from 2006 to 2010, across 22 UK centres. These assessments covered a  
7 wide range of social, cognitive, lifestyle and physical health measures. Informed consent was  
8 obtained from all participants, and this study was conducted under generic approval from the  
9 NHS National Research Ethics Service (approval letter dated 13 May 2016, Ref 16/NW/0274) and  
10 under UK Biobank approvals for application #6553 'Genome-wide association studies of mental  
11 health' (PI Daniel Smith).

### 12 **Genotyping, imputation and quality control**

13 In March 2018 UK Biobank released genetic data for 487,409 individuals, genotyped using the  
14 Affymetrix UK BiLEVE Axiom or the Affymetrix UK Biobank Axiom arrays (Santa Clara, CA, USA) which  
15 contain over 95% common SNP content<sup>6</sup>. Pre-imputation quality control, imputation and post-  
16 imputation cleaning were conducted centrally by UK Biobank (described in the UK Biobank release  
17 documentation).

### 18 **Phenotyping**

19 UK Biobank participants were asked as part of their baseline assessment: "Does your mood often go  
20 up and down?" Those who responded 'yes' to this question were defined as mood instability cases  
21 and those who responded 'no' were defined as controls. To minimise any impact of psychiatric  
22 disorders on observed genetic associations with mood instability, individuals reporting depression,  
23 bipolar disorder, schizophrenia, 'nervous breakdown', self-harm or suicide attempt (all from UK  
24 Biobank data field 20002), and those who reported taking psychotropic medications (data field

1 20003) were excluded from the analysis. Participants were also excluded if: their self-reported sex  
2 did not match their genetically determined sex; UK Biobank had determined them to have sex  
3 chromosome aneuploidy; they were considered by UK Biobank to be heterozygous outliers; they  
4 were missing over 10% of their genetic data; or they were not in the subset classified as British  
5 participants of European ancestry.

## 6 **Genetic association and heritability**

7 Genetic association analysis was performed using BOLT-LMM<sup>7, 8</sup>. This approach makes use of a  
8 genetic relationship matrix (GRM) to control as robustly as possible for population structure without  
9 the need to adjust the model for principal components (PCs), while maximising power by avoiding  
10 the need to exclude related individuals. Additionally, BOLT-LMM builds an infinitesimal model  
11 including all directly genotyped SNPs simultaneously, thereby further increasing power compared to  
12 logistic regression approaches that test each SNP in turn. This ‘genotyped SNPs only’ model has the  
13 imputed SNPs tested against it allowing for the imputation score cut-off criterion to be substantially  
14 reduced and increases the number of SNPs available to test for association with the outcome. BOLT-  
15 LMM treats binary variables as a linear trait but is able to handle binary outcomes well when the  
16 sample size is large and when the number of cases and controls are evenly balanced, as is the case  
17 here.

18 Models were adjusted for age, sex and genotyping array. SNPs were filtered to remove those with  
19 MAF < 0.01, Hardy-Weinberg Equilibrium  $p < 1 \times 10^{-6}$ , or imputation quality score < 0.3. BOLT-LMM  
20 was also used to provide a heritability estimate and  $\lambda_{GC}$  estimate. A secondary analysis was also  
21 performed on a subsample of the cohort which excluded those used in the previous GWAS and  
22 anyone who was related to another participant.

23 Regional plots were made via LocusZoom v1.4<sup>9</sup> as SNPs from the HRC reference panel were also  
24 imputed in the UK biobank genetic data release. We defined a locus as the region of containing a

1 lead SNP and all other SNPs ( $r^2 > 0.1$ ) within a 5MB radius of the lead SNP. The LD was calculated  
2 using 10,000 unrelated Biobank participants who had passed the same genetic QC as those used for  
3 the GWAS.

4 The summary statistics were processed by FUMA<sup>10</sup> (See URLs) for visualisation, MAGMA Gene  
5 Analysis, Gene-set Analysis and Tissue Expression Analysis<sup>11</sup>. The Gene-level Analysis operates by  
6 grouping p values for individual SNPs into a gene test statistic using the mean  $\chi^2$  statistic for the  
7 gene whilst accounting for LD via the use of a European ancestry reference panel. The Gene-set  
8 Analysis groups genes according to MsigDB v6.1<sup>12</sup>, a collection of both curated gene sets and GO  
9 terms, and tests each set in turn against all the other sets. The Tissue Expression Analysis performs a  
10 one-sided test based on the correlation between tissue-specific gene expression profiles and trait-  
11 gene associations.

## 12 **Genetic correlations**

13 Linkage Disequilibrium Score Regression (LDSR)<sup>13</sup> was used to calculate genetic correlations with  
14 psychiatric disorders. The intercept was left unconstrained to allow for sample overlap. For the  
15 MDD<sup>14</sup>, BD<sup>15</sup>, schizophrenia<sup>15</sup> and PTSD<sup>16</sup> phenotypes, we used the most up-to-date GWAS  
16 summary statistics provided by the Psychiatric Genomics Consortium. Anxiety disorder summary  
17 statistics came from the Anxiety NeuroGenetics STudy (ANGST) Consortium<sup>17</sup>.

## 18 **Tissue-specific expression and eQTL analysis**

19 The lead SNP for each locus (unless otherwise noted) was assessed for *cis* effects on gene expression  
20 (eQTLs) in publicly available human dorsolateral prefrontal cortex RNASeq datasets using the Lieber  
21 Institute for Brain Development (LIBD) eQTL browser (See URLs). Each locus was initially examined in  
22 the LIIBD BrainSeq dataset (n = 738; See URLs); SNPs showing significant eQTLs were then assessed  
23 for replication in the Common Mind Consortium (CMC) dataset (n = 547; See URLs). Only eQTLs that  
24 reached a False Discovery Rate (FDR) corrected threshold of  $q \leq 0.05$  in both the LIBD and CMC

1 datasets, and showed the same direction of effect in both, are reported. Tissue-specific expression  
2 patterns were assessed for implicated genes using the GTEx portal<sup>18</sup>. All q values quoted in the text  
3 are FDR corrected.

#### 4 **Genetic principal component generation**

5 Genetic principal components were created using plink 2<sup>19</sup> using pca approx (with default settings)  
6 within the region between base positions 40,850,001 and 41,850,000 on chromosome 17 for the  
7 analysis of the inversion.

#### 8 **Pathway analysis**

9 PLN analysis builds on the fact that variation in complex traits results from perturbations of multiple  
10 molecular components within a smaller number of cellular pathways that can be identified using  
11 gene network approaches. No single dataset or data type can provide a complete picture of the  
12 functional association between genes but a recent method combines information from multiple data  
13 types by weighing functional similarities between genes according to their likelihood of influencing  
14 the same mammalian phenotype(s). This approach has a greater specificity and sensitivity than  
15 analyses using a single data type and other comparable integrative methods<sup>20</sup>. The PLN approach  
16 exploits phenotypic information from over seven thousand genes whose function has been  
17 experimentally perturbed in the mouse and evaluates the ability of different data types such as  
18 protein-protein interactions (PPI), co-expression (RNA or protein), and semantic similarity score  
19 based on literature or Gene Ontology (GO) annotations or pathway annotations (KEGG), to predict  
20 whether knockout of the orthologues of a given pair of human genes will yield similar phenotypes.  
21 By weighting those data types accordingly, they are integrated to generate a single combined  
22 measure of functional similarity between gene pairs. The resulting network of pairwise gene  
23 functional similarities is termed a phenotypic-linkage network (PLN)<sup>20</sup>. To increase the sensitivity and  
24 specificity to detect functional associations relevant for a specific disease/trait, it is possible to select

1 only those mouse phenotypes that are relevant for a specific disorder in the data type weighting  
2 evaluation step<sup>21</sup>. Following this approach, we conducted a further analysis in which we re-weighted  
3 our generic PLN to be more sensitive to functional genomics data most informative to mood  
4 instability by considering only phenotypes within the over-arching mouse phenotype ontology  
5 (MPO) category *Nervous System* (MP:0003631). The PLN and nervous-PLN (NS-PLN) were built using  
6 the same 16 functional genomics datasets described by Honti et al<sup>20</sup>, with 64,640,972 and  
7 49,656,123 weighted links respectively.

8 Following the approach described by Sandor et al., we identified ‘communities’ of densely  
9 interconnected groups of genes (including at least 20 genes) within each PLN and tested whether  
10 any communities were enriched in genes harboured by GWA/subGWA intervals. This test examines  
11 how many of these intervals harboured at least one gene belonging to a given Community as  
12 compared to randomly shifted intervals equal in gene number. This approach makes no prior  
13 hypothesis about the number or nature of genes within each GWA interval.

#### 14 **Definition of GWA and subGWA intervals**

15 The GWAS and subGWA intervals were defined by considering SNPs attaining an association p-value  
16 of  $5 \times 10^{-8}$  and  $1 \times 10^{-6}$  identified 6375 (GWA) and 9358 (sub-GWA) SNPs. We then identified the  
17 haplotypic block containing each of these of these SNPs using genotypes in the 1000 Genome  
18 Project and the python pipeline developed by Brent Pedersen (See URLs). We defined GWA/sub  
19 GWA intervals by identifying the most distant block on a chromosome within a region of 500Kb of  
20 the lead SNP. We then added an additional 300 kb on either side of the interval to include genes that  
21 may be regulated by regulatory variants with effects captured by the lead SNPs. For subGWA  
22 regions, we excluded those subGWA intervals harbouring genes present in GWA intervals.

23



## 1 Results

### 2 Demographics

3 In this GWAS sample of 363,705 individuals without a history of psychiatric disorder, 43.2% reported  
4 mood instability (n = 157,039) and the rest did not (n = 206,666). There was a higher proportion of  
5 females amongst the mood instability cases than in controls (55.4% versus 51.2% respectively), and  
6 the mean age of cases was lower than for controls (55.8 years versus 57.7 years).

### 7 GWAS findings

8 We detected 46 loci across the genome with  $p < 5 \times 10^{-8}$  (Figure 1 and Table S1) and an estimated SNP  
9 heritability ( $h^2$ ) of 0.09 (S.E. = 0.02). The heritability estimate has increased from the previous GWAS  
10 by approximately 2% (Previous  $h^2 = 0.07$ , SE = 0.007). We attribute the increase in SE to the differing  
11 methodologies. The distribution of test statistics was consistent with a polygenic contribution to risk  
12 ( $\lambda_{GC} = 1.21$ ;  $\lambda_{1000} = 1.001$ ; LDSR intercept = 1.041; SE = 0.006). In addition, to help validate the four  
13 loci identified in the previous mood instability GWAS, we tested the top SNP from each locus in a  
14 sub-sample that excluded individuals in the previous smaller GWAS and those individuals related to  
15 another Biobank participant (n = 169,857). All four SNPs were associated with mood instability after  
16 Bonferroni correction ( $\alpha < 0.0125$ , Table S2). We also note that the directions of effect were the  
17 same as for the previous GWAS findings.

### 18 Gene-level and Gene Set Analysis

19 244 significant genes were detected by MAGMA (Supplementary Table S3) and FUMA gene analysis.  
20 The Gene Set Analysis returned 6 enriched gene sets that met the threshold for significance after  
21 Bonferroni correction (Supplementary Table S4). Of these, 4 sets were related to brain development  
22 and differentiation of neurons, glial cells and astrocytes or neurogenesis. Other enriched sets  
23 included the Nikolsky breast cancer 16q24 amplicon genes and the prepulse inhibition gene sets.

24

## 1 Tissue expression analysis

2 MAGMA tissue expression analysis identified 11 tissue categories, all of which were in the brain  
3 (Figure S1). Indeed, all sampled brain areas except substantia nigra showed enrichment (i.e., frontal  
4 and anterior cingulate cortex, basal ganglia, hippocampus, amygdala, hypothalamus and  
5 cerebellum). **Genetic correlations**

6 Genetic correlations were calculated between mood instability and five psychiatric phenotypes of  
7 interest (Table 1). All genetic correlations remained significant after FDR correction ( $q < 0.05$ ). The  
8 largest correlations were with MDD ( $r_g = 0.74$ ,  $q = 8.50 \times 10^{-157}$ ) and anxiety ( $r_g = 0.64$ ,  $q = 8.08 \times 10^{-6}$ ).  
9 PTSD had a moderate correlation with mood instability ( $r_g = 0.32$ ,  $q = 1.23 \times 10^{-2}$ ) and both  
10 schizophrenia and bipolar disorder had weak but significant correlations (schizophrenia  $r_g = 0.14$ ,  $q =$   
11  $1.60 \times 10^{-5}$ , BD  $r_g = 0.09$ ,  $q = 0.0012$ ).

## 12 eQTL analysis

13 Nine of the GWAS loci showed significant eQTLs, many potentially with specific isoforms  
14 (summarised in Table S5 and presented in full in Supplementary Table S6). The strongest evidence of  
15 association with expression levels was for rs669915, an eQTL located within a region of strong  
16 linkage disequilibrium (LD) in chromosome 17q21 resulting from the existence of a 900kb inversion  
17 polymorphism that is common in European populations<sup>22</sup>. The extended region of LD across this  
18 portion of the chromosome makes it challenging to identify causal SNPs or the genes they regulate.  
19 The rs669915 eQTL was most strongly associated with expression of *LRRC37A4P* (LIBD dataset  
20 minimum  $q = 1.96 \times 10^{-99}$ ; CMC dataset  $q = 3.99 \times 10^{-65}$ ), an expressed pseudogene, but there are  
21 many alternative candidates for genes regulated by this SNP, including *MAPT* and *CRHR1*, for which  
22 it was also an eQTL. (Supplementary Table S5).

23 The chromosome 17q21 inversion polymorphism has itself been reported to affect the expression of  
24 genes in this region<sup>23</sup>. We therefore investigated whether rs669915 might 'tag' the expression

1 effects mediated by the inversion polymorphism in our sample. Using the method of de Jong and  
2 colleagues, we constructed genetic principal components (GPCs) from SNPs within the region  
3 between base positions 40,850,001 and 41,850,000 on chromosome 17. A plot of the first two GPCs  
4 is shown in (Figure S2) and reveals three distinct clusters of individuals, each representing one of the  
5 three inversion polymorphism genotypes, H1/H1 (right-most cluster;  $n = 162,113$ ), H1/H2 (middle  
6 cluster;  $n = 158,506$ ) and H2/H2 (left-most cluster;  $n = 38,597$ ). The H1 inversion allele had a  
7 population frequency of 0.32, far higher than the frequency reported by de Jong. In linear regression  
8 analyses, there was no association between mood instability phenotype and inversion genotype  
9 using a model of additive allelic effects (no. of H2 alleles) and adjusting for age, sex and genotyping  
10 array ( $p = 0.835$ ).

#### 11 **Nervous system PLN analyses (NS-PLN)**

12 Amongst both GWA and subGWA gene sets, we found a disproportionate aggregation of genes  
13 within only one community, Community 26 within the NS-PLN (21 GWAS loci including at least one  
14 gene,  $q = 0.011$ ; 25 “subGWAS “loci including at least one,  $q = 0.018$ ) (**Fig 2A**). Examining the entire  
15 NS-PLN Community 26 gene, we found that it was significantly enriched in genes, whose unique 1:1  
16 orthologues in the mouse when disrupted induce abnormalities in synaptic transmission (Mouse  
17 Phenotype Ontology term MP:0003635;  $q = 2.77e^{-118}$ , 75 genes expected vs 259 gene observed).  
18 However, we did not find evidence that the unique mouse orthologues of mood instability GWA and  
19 subGWA genes that belonged to Community 26 were enriched for any particular mouse phenotype.  
20 Nonetheless, we found that the 37 and 35 GWA and subGWA genes present in the Community 26  
21 were highly functionally connected with other Community 26 genes annotated with abnormal  
22 synaptic transmission phenotype term (Figure 2B).

23

## 1 Discussion

### 2 Main findings

3 These analyses represent the largest genetic study of mood instability to date. Forty six unique loci  
4 associated with mood instability were identified, with a heritability estimate of 9%. Our findings  
5 confirm the four loci identified in our initial GWAS on the UK Biobank interim data release<sup>4</sup> and are  
6 further validated by tissue expression analyses (enrichment for 11 brain regions) and pathway  
7 analyses (6 enrichment pathways, 4 of which relate to the development and differentiation of  
8 neurons). The large number of individuals in this study also provided substantial power to detect  
9 genetic correlations with psychiatric traits via LDSR. All five psychiatric traits assessed had a  
10 significant genetic correlation with mood instability. Some of these correlations were strong  
11 (particularly for MDD and anxiety) but others were weaker than expected. For example, the genetic  
12 correlation between mood instability and BD was only 9%, perhaps suggesting that the mood  
13 instability phenotype in this study differs from the affective instability that is a core feature of BD.

### 14 Biology of mood instability

15 Loci associated with mood instability included genes that are involved across a variety of  
16 biochemical pathways, as well as brain development and function. For example, several gene  
17 products localised to the synapse. *PLCL1* and *PLCL2* are involved in GABA signalling<sup>24</sup> and melatonin  
18 signalling respectively, and *RAPSN* assists in anchoring nicotinic acetylcholine receptors at synaptic  
19 sites<sup>25</sup>. *PLCL1* has already been identified in a GWAS of schizophrenia<sup>26</sup> and *PLCL2* has been shown to  
20 be upregulated in bipolar disorder<sup>27</sup>. Additionally, we identified *CALB2* which has many biological  
21 functions, including a role in modulating neuronal excitability<sup>28</sup>. Both *DCC* (identified in the previous  
22 mood instability GWAS) and *BSN* facilitate the release of neurotransmitters within the active zone of  
23 some axons<sup>29</sup>. *BSN* has also been shown to be associated with schizoaffective disorder via GABA  
24 signalling<sup>30</sup>. *FARP1* promotes dendritic growth<sup>31</sup> and, although it has so far not been directly linked

1 to psychiatric disorders, it has been shown to regulate dendritic complexity<sup>32</sup>( reduced dendritic  
2 complexity is a recognised feature of schizophrenia<sup>33</sup>).

3 We identified several developmental genes, including *NEGR1*<sup>34</sup>, *RARB*<sup>35</sup> and *EPHB1*<sup>36</sup>, and  
4 transcription factors such as *HIVEP2* (loss of function of which causes intellectual disability<sup>37</sup>) and  
5 *TCF4* (previously associated with schizophrenia<sup>38</sup>). *NEGR1* was identified by 23andMe within their  
6 GWAS of MDD<sup>39</sup> and increased levels of NEGR1 protein in spinal fluid have been identified in both  
7 MDD and BD<sup>40</sup>. *RARB* is involved in retinoic acid synthesis pathways that have been associated  
8 depressive symptoms in mice<sup>41</sup> and has also been found to have increased expression in patients  
9 with schizophrenia<sup>42</sup>. The methylation state of the *EPHB1* gene has been linked to MDD<sup>43</sup> and SNP-  
10 based analyses have identified association between *EPHB1*'s and symptoms of schizophrenia<sup>44</sup>.

11 We also found association with several genes involved in mitochondrial energy production, such as  
12 *NDUFAF3*, *NDUFS3*, *PTPMT1*, *KBTBD4* and *MTCH2*, suggesting that part of the physiology of mood  
13 instability may relate to energy dysregulation.

14 In addition to protein coding genes, several loci were identified in regions containing non-coding  
15 protein sequences such as *AC019330.1*, *AC133680.1*, *RP11-6N13.1* and *RP11-436d23.1*. Additionally,  
16 eQTL analyses identified three more possible non-coding genes (*RP11-481A20.10*, *RP11-481A20.11*  
17 and *FAM85B*) suggesting a possible RNA interference or post-transcriptional regulation basis to  
18 mood instability.

19 Furthermore, the eQTL analyses highlighted the 17q21 inversion. Our principal component analysis  
20 of this region did not detect a significant association leading us to conclude that it is the SNPs in the  
21 region (not the inversion itself) driving the association. It is possible that lead SNPs may tag,  
22 enhancer RNA or eRNA which we were unable to detect here (LIBD data was generated using poly-A  
23 RNA and so targets messenger RNA). However, our findings are consistent with a recent report

1 implicating dopamine neuron-enriched enhancer activity in this region in several dopamine-related  
2 psychiatric and neurological conditions<sup>45</sup>.

3 Genes within regions associated with mood instability were functionally associated with synaptic  
4 transmission, a key pathway for psychiatric disorders, albeit this functional association was only  
5 detectable after focussing our gene network towards data types most informative for mammalian  
6 nervous system phenotypes. Among the genes lying within associated loci that contribute to this  
7 functional association are several interesting candidate genes. *HTR4* is a member of the family of  
8 serotonin receptors and implicated in depression and its treatment<sup>46, 47</sup>. *MCHR1*, melanin  
9 concentrating hormone receptor 1, is a G protein-coupled which binds melanin-concentrating  
10 hormone. *MCHR1* can inhibit cAMP accumulation and stimulate intracellular calcium flux, and may  
11 be involved in the neuronal regulation of food consumption<sup>46</sup> and the locus showed association with  
12 schizophrenia in a Danish sample<sup>49</sup>.

### 13 **Strengths and Limitations**

14 As noted above, this is the largest GWAS of a mood instability phenotype to date and has  
15 successfully identified new loci, eQTLs, tissues, genetic correlations and gene network enrichments.  
16 However, there are several limitations, most notably the use of a single question to define mood  
17 instability, and the lack of objective verification of this phenotype. There are more detailed  
18 suggested measurement scales for mood instability, such as that developed by Chaturvedi and  
19 colleagues<sup>50</sup>. In the future, the use of these more comprehensive assessments in large samples may  
20 provide some clarification of our findings, for example the lack of strong genetic correlation between  
21 mood instability and BD. Nevertheless, the single question approach to mood instability has been  
22 widely used, and shown to identify robust associations with a range of health outcomes and  
23 disorders<sup>1,3</sup>. Similarly, exclusions for psychiatric disorder were based on self-report.

1 We validated the top hits of the previous GWAS however the cohort used was not truly independent  
2 (it was also part of the UK Biobank cohort). It would be of interest to replicate the 46 loci identified  
3 here should sufficiently large independent replication cohorts become available in the future. As  
4 well as replication of the loci, further analysis of sex specific differences would be of interest because  
5 mood instability was more common in females than males. Although this difference was relatively  
6 small, our reported analyses were adjusted for sex and these differences are similar to those  
7 reported elsewhere<sup>51</sup>.

8 It is also important to note that direct links between genetic risk loci and network constituents in the  
9 PLN analysis will have to await the release of more completely annotated gene databases. The  
10 incompleteness of phenotypic annotations is likely to explain why the genes identified in the PLN  
11 analysis don't have corresponding organismal or physiological phenotypes, but the fact that there  
12 were strong functional associations between the genes in the network we detected and mouse  
13 orthologues that have the synaptic transmission phenotype annotation suggests that the mood  
14 instability genes will also reveal this phenotype when more completely annotated databases  
15 become available.

16 Finally, we note the large difference in frequencies of the inversion polymorphism on chromosome  
17 17 from that reported by De Jong<sup>23</sup>. This difference could be due to the populations sampled to  
18 estimate the frequency or over representation in those who joined UK Biobank. It is however  
19 important to note that the inversion itself would be likely to contribute only a small proportion of  
20 the mood instability phenotype, such that even larger sample sizes than were used here would be  
21 needed to detect a correlation where one exists..

## 22 **Conclusion**

23 In summary, with a tripling in sample size from the previous GWAS, we identified substantially more  
24 associations with mood instability in the UK Biobank cohort<sup>4</sup>. Future analyses of the precise roles

1 that these associations play in the clinical expression of mood instability will be relevant for the wide  
2 range of psychiatric phenotypes in which mood instability occurs. We have also been able to more  
3 confidently place these GWAS findings within relevant biological contexts and some of the loci and  
4 pathways identified may represent candidates for future novel drug development.

5 Our findings are also of interest in the context of precision medicine innovations for mental health. It  
6 is possible that polygenic risk scores derived from this work could be applied to clinical populations  
7 to conduct pharmacogenomics studies and to inform patient stratification approaches. Overall, we  
8 hope that our findings will stimulate further research on the biology and treatment of mood  
9 instability across a range of mood and psychotic disorders.

#### 10 **Conflict of interest**

11 The authors have no conflicts of interest to declare.

#### 12 **URLs**

13 FUMA - <http://fuma.ctglab.nl/>

14 Python pipeline developed by Brent Pedersen - <https://gist.github.com/brentp/5050522>

15 LIBD website - <http://eqtl.brainseq.org/>

16 LIBD eQTL Browser phase 1 - <http://eqtl.brainseq.org/phase1/eqtl/>

17 CommonMind Consortium public-private partnership <http://commonmind.org/WP>

18



1

## Acknowledgements

2 JW is supported by the JMAS Sim Fellowship for depression research from the Royal College of  
3 Physicians of Edinburgh (173558). AF is supported by an MRC Doctoral Training Programme  
4 Studentship at the University of Glasgow (MR/K501335/1). RJS is supported by a UKRI Innovation-  
5 HDR-UK Fellowship (MR/S003061/1). KJAJ is supported by an MRC Doctoral Training Programme  
6 Studentship at the Universities of Glasgow and Edinburgh. DJS acknowledges the support of a Lister  
7 Prize Fellowship (173096) and the MRC Mental Health Data Pathfinder Award (MC\_PC\_17217). EMT  
8 and PJH are supported by the Oxford Health NIHR Biomedical Research Centre. The views  
9 expressed are those of the authors and not necessarily those of the National Health Service, NIHR or  
10 the Department of Health. Data were generated as part of the CommonMind Consortium supported  
11 by funding from Takeda Pharmaceuticals Company Limited, F. Hoffman-La Roche Ltd and NIH grants  
12 R01MH085542, R01MH093725, P50MH066392, P50MH080405, R01MH097276, RO1-MH-075916,  
13 P50M096891, P50MH084053S1, R37MH057881 and R37MH057881S1, HHSN271201300031C,  
14 AG02219, AG05138 and MH06692. Brain tissue for the study was obtained from the following brain  
15 bank collections: the Mount Sinai NIH Brain and Tissue Repository, the University of Pennsylvania  
16 Alzheimer's Disease Core Center, the University of Pittsburgh NeuroBioBank and Brain and Tissue  
17 Repositories and the NIMH Human Brain Collection Core. CMC Leadership: Pamela Sklar, Joseph  
18 Buxbaum (Icahn School of Medicine at Mount Sinai), Bernie Devlin, David Lewis (University of  
19 Pittsburgh), Raquel Gur, Chang-Gyu Hahn (University of Pennsylvania), Keisuke Hirai, Hiroyoshi  
20 Toyoshiba (Takeda Pharmaceuticals Company Limited), Enrico Domenici, Laurent Essioux (F.  
21 Hoffman-La Roche Ltd), Lara Mangravite, Mette Peters (Sage Bionetworks), Thomas Lehner, Barbara  
22 Lipska (NIMH).

23 We thank all participants in the UK Biobank study. UK Biobank was established by the Wellcome  
24 Trust, Medical Research Council, Department of Health, Scottish Government and Northwest

- 1 Regional Development Agency. UK Biobank has also had funding from the Welsh Assembly
- 2 Government and the British Heart Foundation. Data collection was funded by UK Biobank.
- 3 The summary statistics of the GWAS are available upon request by contacting the corresponding
- 4 author.

1  
2  
3  
4  
5  
6  
7  
8  
9  
10  
11  
12  
13  
14  
15  
16  
17  
18  
19  
20  
21  
22  
23  
24  
25  
26  
27  
28  
29  
30  
31  
32  
33  
34  
35  
36  
37  
38  
39  
40

## References

1. Marwaha S, He Z, Broome M, Singh SP, Scott J, Eyden J *et al.* How is affective instability defined and measured? A systematic review. *Psychol Med* 2014; **44**(9): 1793-1808.
2. Cuthbert BN, Insel TR. Toward the future of psychiatric diagnosis: the seven pillars of RDoC. *BMC Med* 2013; **11**: 126.
3. Broome MR, Saunders KEA, Harrison PJ, Marwaha S. Mood instability: significance, definition and measurement. *The British journal of psychiatry : the journal of mental science* 2015; **207**(4): 283-285.
4. Ward J, Strawbridge RJ, Bailey MES, Graham N, Ferguson A, Lyall DM *et al.* Genome-wide analysis in UK Biobank identifies four loci associated with mood instability and genetic correlation with major depressive disorder, anxiety disorder and schizophrenia. *Translational Psychiatry* 2017; **7**(11): 1264.
5. Sudlow C, Gallacher J, Allen N, Beral V, Burton P, Danesh J *et al.* UK biobank: an open access resource for identifying the causes of a wide range of complex diseases of middle and old age. *PLoS Med* 2015; **12**(3): e1001779.
6. Biobank U. Genotyping of 500,000 UK Biobank participants. Description of sample processing workflow and preparation of DNA for genotyping. 2015;11 September 2015.
7. Loh PR, Tucker G, Bulik-Sullivan BK, Vilhjalmsson BJ, Finucane HK, Salem RM *et al.* Efficient Bayesian mixed-model analysis increases association power in large cohorts. *Nat Genet* 2015; **47**(3): 284-290.
8. Loh P-R, Kichaev G, Gazal S, Schoech AP, Price AL. Mixed-model association for biobank-scale datasets. *Nature Genetics* 2018.
9. Watanabe K, Taskesen E, van Bochoven A, Posthuma D. Functional mapping and annotation of genetic associations with FUMA. *Nature Communications* 2017; **8**(1): 1826.
10. de Leeuw CA, Mooij JM, Heskes T, Posthuma D. MAGMA: Generalized Gene-Set Analysis of GWAS Data. *PLOS Computational Biology* 2015; **11**(4): e1004219.
11. Subramanian A, Tamayo P, Mootha VK, Mukherjee S, Ebert BL, Gillette MA *et al.* Gene set enrichment analysis: A knowledge-based approach for interpreting genome-wide expression profiles. *Proceedings of the National Academy of Sciences* 2005; **102**(43): 15545.

- 1 12. Pruim RJ, Welch RP, Sanna S, Teslovich TM, Chines PS, Gliedt TP *et al.* LocusZoom: regional  
2 visualization of genome-wide association scan results. *Bioinformatics (Oxford, England)*  
3 2010; **26**(18): 2336-2337.
- 4
- 5 13. Bulik-Sullivan BK, Loh P-R, Finucane HK, Ripke S, Yang J, Schizophrenia Working Group of the  
6 Psychiatric Genomics C *et al.* LD Score regression distinguishes confounding from  
7 polygenicity in genome-wide association studies. *Nat Genet* 2015; **47**(3): 291-295.
- 8
- 9 14. Wray NR, Ripke S, Mattheisen M, Trzaskowski M, Byrne EM, Abdellaoui A *et al.* Genome-  
10 wide association analyses identify 44 risk variants and refine the genetic architecture of  
11 major depression. *Nat Genet* 2018; **50**(5): 668-681.
- 12
- 13 15. Genomic Dissection of Bipolar Disorder and Schizophrenia, Including 28 Subphenotypes. *Cell*  
14 2018; **173**(7): 1705-1715.e1716.
- 15
- 16 16. Duncan LE, Ratanatharathorn A, Aiello AE, Almli LM, Amstadter AB, Ashley-Koch AE *et al.*  
17 Largest GWAS of PTSD (N=20 070) yields genetic overlap with schizophrenia and sex  
18 differences in heritability. *Mol Psychiatry* 2018; **23**(3): 666-673.
- 19
- 20 17. Otowa T, Hek K, Lee M, Byrne EM, Mirza SS, Nivard MG *et al.* Meta-analysis of genome-wide  
21 association studies of anxiety disorders. *Molecular psychiatry* 2016; **21**(10): 1391-1399.
- 22
- 23 18. Consortium GT. The Genotype-Tissue Expression (GTEx) project. *Nature genetics* 2013; **45**(6):  
24 580-585.
- 25
- 26 19. Purcell S, Neale B, Todd-Brown K, Thomas L, Ferreira Manuel A R, Bender D *et al.* PLINK: A  
27 Tool Set for Whole-Genome Association and Population-Based Linkage Analyses. *American*  
28 *Journal of Human Genetics* 2007; **81**(3): 559-575.
- 29
- 30 20. Honti F, Meader S, Webber C. Unbiased functional clustering of gene variants with a  
31 phenotypic-linkage network. *PLoS Comput Biol* 2014; **10**(8): e1003815.
- 32
- 33 21. Sandor C, Beer NL, Webber C. Diverse type 2 diabetes genetic risk factors functionally  
34 converge in a phenotype-focused gene network. *PLoS Comput Biol* 2017; **13**(10): e1005816.
- 35
- 36 22. Stefansson H, Helgason A, Thorleifsson G, Steinthorsdottir V, Masson G, Barnard J *et al.* A  
37 common inversion under selection in Europeans. *Nature Genetics* 2005; **37**: 129.
- 38
- 39 23. de Jong S, Chepelev I, Janson E, Strengman E, van den Berg LH, Veldink JH *et al.* Common  
40 inversion polymorphism at 17q21.31 affects expression of multiple genes in tissue-specific  
41 manner. *BMC Genomics* 2012; **13**: 458.

42

- 1 24. Kanematsu T, Jang I-S, Yamaguchi T, Nagahama H, Yoshimura K, Hidaka K *et al.* Role of the  
2 PLC-related, catalytically inactive protein p130 in GABA(A) receptor function. *The EMBO*  
3 *journal* 2002; **21**(5): 1004-1011.
- 4
- 5 25. Muller JS, Baumeister SK, Rasic VM, Krause S, Todorovic S, Kugler K *et al.* Impaired receptor  
6 clustering in congenital myasthenic syndrome with novel RAPSN mutations. *Neurology* 2006;  
7 **67**(7): 1159-1164.
- 8
- 9 26. Schizophrenia Working Group of the Psychiatric Genomics C. Biological insights from 108  
10 schizophrenia-associated genetic loci. *Nature* 2014; **511**(7510): 421-427.
- 11
- 12 27. Nakatani N, Hattori E, Ohnishi T, Dean B, Iwayama Y, Matsumoto I *et al.* Genome-wide  
13 expression analysis detects eight genes with robust alterations specific to bipolar I disorder:  
14 relevance to neuronal network perturbation. *Human Molecular Genetics* 2006; **15**(12): 1949-  
15 1962.
- 16
- 17 28. Camp AJ, Wijesinghe R. Calretinin: modulator of neuronal excitability. *Int J Biochem Cell Biol*  
18 2009; **41**(11): 2118-2121.
- 19
- 20 29. Winter C, tom Dieck S, Boeckers TM, Bockmann J, Kampf U, Sanmarti-Vila L *et al.* The  
21 presynaptic cytomatrix protein Bassoon: sequence and chromosomal localization of the  
22 human BSN gene. *Genomics* 1999; **57**(3): 389-397.
- 23
- 24 30. Hamshere ML, Green EK, Jones IR, Jones L, Moskvina V, Kirov G *et al.* Genetic utility of  
25 broadly defined bipolar schizoaffective disorder as a diagnostic concept. *Br J Psychiatry*  
26 2009; **195**(1): 23-29.
- 27
- 28 31. Zhuang B, Su YS, Sockanathan S. FARP1 promotes the dendritic growth of spinal motor  
29 neuron subtypes through transmembrane Semaphorin6A and PlexinA4 signaling. *Neuron*  
30 2009; **61**(3): 359-372.
- 31
- 32 32. Cheadle L, Biederer T. Activity-Dependent Regulation of Dendritic Complexity by Semaphorin  
33 3A through Farp1. *The Journal of Neuroscience* 2014; **34**(23): 7999.
- 34
- 35 33. Broadbelt K, Byne W, Jones LB. Evidence for a decrease in basilar dendrites of pyramidal cells  
36 in schizophrenic medial prefrontal cortex. *Schizophrenia Research* 2002; **58**(1): 75-81.
- 37
- 38 34. Takita J, Chen Y, Okubo J, Sanada M, Adachi M, Ohki K *et al.* Aberrations of NEGR1 on 1p31  
39 and MYEOV on 11q13 in neuroblastoma. *Cancer Sci* 2011; **102**(9): 1645-1650.
- 40
- 41 35. van der Wees J, Schilthuis JG, Koster CH, Diesveld-Schipper H, Folkers GE, van der Saag PT *et*  
42 *al.* Inhibition of retinoic acid receptor-mediated signalling alters positional identity in the  
43 developing hindbrain. *Development* 1998; **125**(3): 545-556.

- 1  
2 36. Wilkinson DG. Multiple roles of EPH receptors and ephrins in neural development. *Nat Rev*  
3 *Neurosci* 2001; **2**(3): 155-164.
- 4  
5 37. Srivastava S, Engels H, Schanze I, Cremer K, Wieland T, Menzel M *et al.* Loss-of-function  
6 variants in HIVEP2 are a cause of intellectual disability. *European Journal of Human Genetics*  
7 2016; **24**(4): 556-561.
- 8  
9 38. Williams HJ, Moskvina V, Smith RL, Dwyer S, Russo G, Owen MJ *et al.* Association between  
10 TCF4 and schizophrenia does not exert its effect by common nonsynonymous variation or by  
11 influencing cis-acting regulation of mRNA expression in adult human brain. *Am J Med Genet*  
12 *B Neuropsychiatr Genet* 2011; **156b**(7): 781-784.
- 13  
14 39. Hyde CL, Nagle MW, Tian C, Chen X, Paciga SA, Wendland JR *et al.* Identification of 15  
15 genetic loci associated with risk of major depression in individuals of European descent.  
16 *Nature genetics* 2016; **48**(9): 1031-1036.
- 17  
18 40. Maccarrone G, Ditzen C, Yassouridis A, Rewerts C, Uhr M, Uhlen M *et al.* Psychiatric patient  
19 stratification using biosignatures based on cerebrospinal fluid protein expression clusters.  
20 *Journal of Psychiatric Research* 2013; **47**(11): 1572-1580.
- 21  
22 41. O'Reilly KC, Shumake J, Gonzalez-Lima F, Lane MA, Bailey SJ. Chronic Administration of 13-  
23 Cis-Retinoic Acid Increases Depression-Related Behavior in Mice. *Neuropsychopharmacology*  
24 2006; **31**: 1919.
- 25  
26 42. Tsai SY, Catts VS, Fullerton JM, Corley SM, Fillman SG, Weickert CS. Nuclear Receptors and  
27 Neuroinflammation in Schizophrenia. *Molecular Neuropsychiatry* 2017; **3**(4): 181-191.
- 28  
29 43. Davies MN, Krause L, Bell JT, Gao F, Ward KJ, Wu H *et al.* Hypermethylation in the ZBTB20  
30 gene is associated with major depressive disorder. *Genome Biology* 2014; **15**(4): R56-R56.
- 31  
32 44. Su L, Ling W, Jiang J, Hu J, Fan J, Guo X *et al.* Association of EPHB1 rs11918092 and EFNB2  
33 rs9520087 with psychopathological symptoms of schizophrenia in Chinese Zhuang and Han  
34 populations. *Asia Pac Psychiatry* 2016; **8**(4): 306-308.
- 35  
36 45. Dong X, Liao Z, Gritsch D, Hadzhiev Y, Bai Y, Locascio JJ *et al.* Enhancers active in dopamine  
37 neurons are a primary link between genetic variation and neuropsychiatric disease. *Nature*  
38 *Neuroscience* 2018; **21**(10): 1482-1492.
- 39  
40 46. Fontaine-Bisson B, Thorburn J, Gregory A, Zhang H, Sun G. Melanin-concentrating hormone  
41 receptor 1 polymorphisms are associated with components of energy balance in the  
42 Complex Diseases in the Newfoundland Population: Environment and Genetics (CODING)  
43 study. *Am J Clin Nutr* 2014; **99**(2): 384-391.

- 1  
2 47. Demontis D, Nyegaard M, Christensen JH, Severinsen J, Hedemand A, Hansen T *et al*. The  
3 gene encoding the melanin-concentrating hormone receptor 1 is associated with  
4 schizophrenia in a Danish case-control sample. *Psychiatr Genet* 2012; **22**(2): 62-69.

5

6

1 **Figure 1 Manhattan and QQ plot of mood instability GWAS.**

2 **Table 1 Genetic correlations of mood instability with psychiatric phenotypes.**  $r_g$  = genetic  
3 correlation with mood instability, S.E. = standard error of the genetic correlation, Z = the test  
4 statistic, p = the p value, q the False discovery rate corrected p value. MDD = major depressive  
5 disorder, PTSD = post-traumatic stress disorder.

6 **Figure 2 Different Mood associated genetic risk variants converge in a nervous specific gene**  
7 **network.** (A) Enrichments of gene functional communities from a generic PLN and from a Nervous-  
8 System (NS) PLN within Mood-GWA and subGWA loci (see Methods). The Community ID is given first  
9 in the descriptor followed by the number of genes within that community. Only communities formed  
10 from over 20 genes are shown. (B) Gene subnetwork of Community 26 from NS-PLN showing  
11 functional associations between genes residing in Mood-associated GWA (red squares) and subGWA  
12 (orange squares) intervals and genes whose unique mouse orthologues are annotated with  
13 *abnormal synaptic transmission phenotype* (cyan squares). To increase clarity, only genes with  
14 *abnormal synaptic transmission phenotype* annotation with at least three functional links to genes  
15 residing in GWA and subGWA regions are shown. The colour of the link connecting two genes  
16 indicates the strongest information source supporting the functional association.



**Figure 1.**

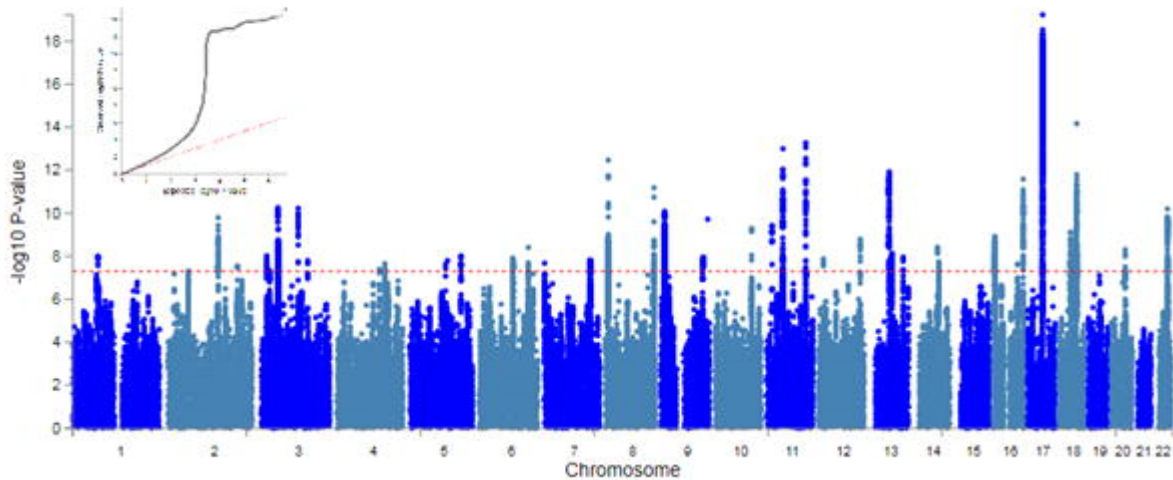

# Figure 2.

**A**

nervous-PLN  
PLN

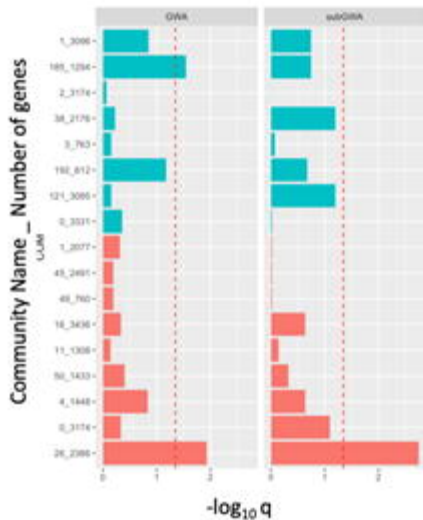**B**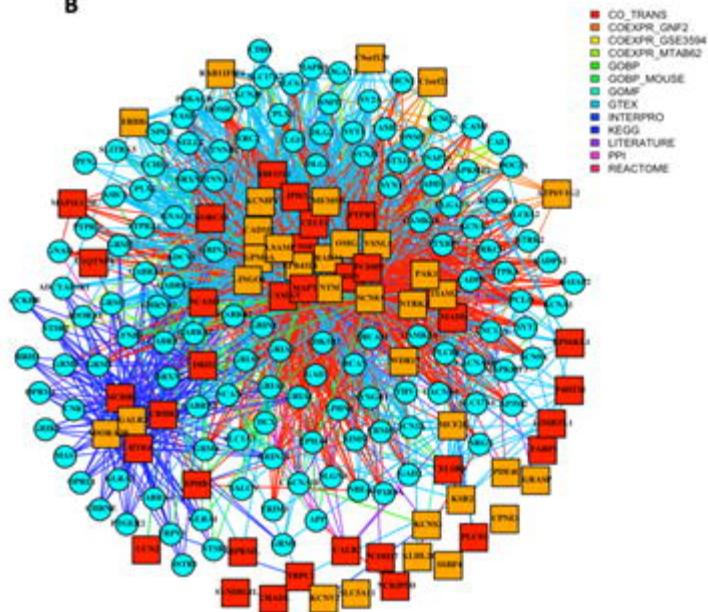

**Figure S1.**

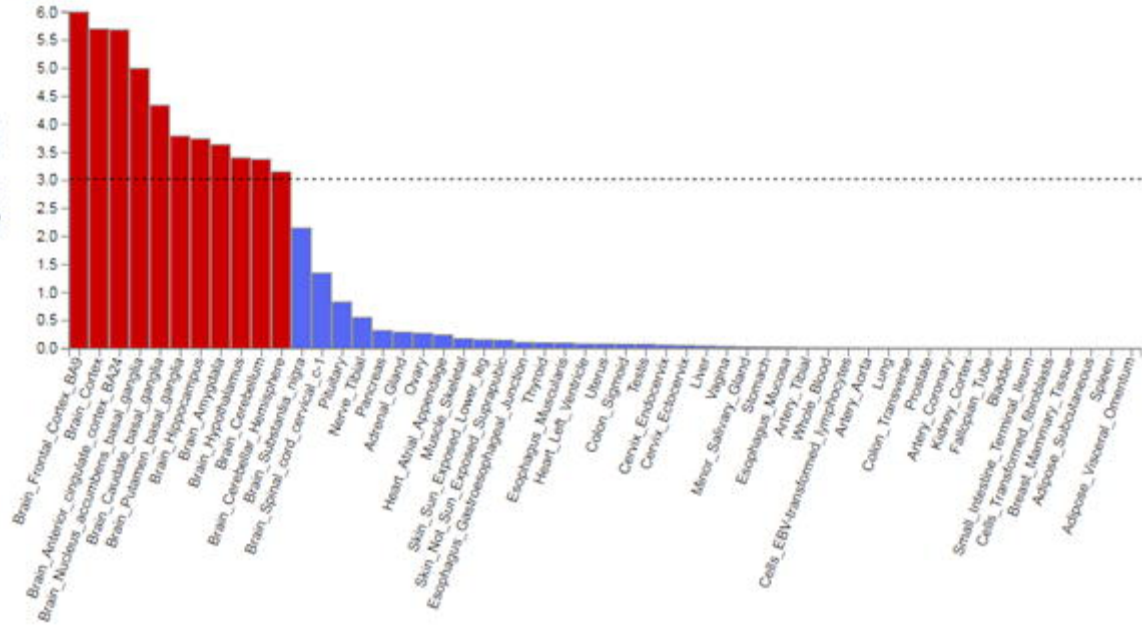

**Figure S2.**

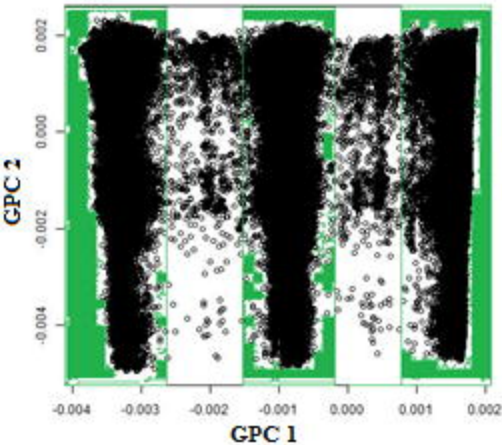

Source: https://www.biorxiv.org/content/10.1101/549931v2.full.pdf
